# Supplementary material for: Personality, abnormal behaviour, and health: An evaluation of the welfare of police horses
Source: PubMed Central journal article supplement (PMC6124763; doi:10.1371/journal.pone.0202750), 2018-09-05
Supplement: pone.0202750.s001.pdf [file pone.0202750.s001.pdf]

20 May 2018.

The Ethics Commission of Animals use to research from Pontifícia Universidade Católica of Minas Gerais (PUC Minas) evaluated the project of Ivana Gabriela Schork, intitule “Behavioral Disorders and Personality: an evaluation of the welfare in horses”, concluding that this project did not need of recommendations from this Commission due its execution to be based only in observations of the routine of animals at police academy.

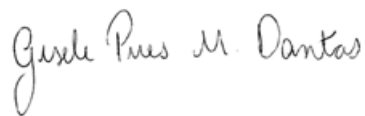

**Gisele Pires de Mendonça Dantas**

**CEUA PUC Minas Coordinator**
